# Supplementary material for: Assessing invertebrate herbivory in human‐modified tropical forest canopies
Source: PubMed Central journal article supplement (PMC8093672; doi:10.1002/ece3.7295), 2021-03-26
Supplement: ECE3-11-4012-s002.pdf [file ECE3-11-4012-s002.pdf]

| Herbivory form | Response Variable |                         | Spatial autocorrelation  | Model                                                        |                     |                             | Result (anova)                                                                                                                                                                                                                                             | Observations                                                                                                                                                                                                                                                                                                                                                                                                                          |
|----------------|-------------------|-------------------------|--------------------------|--------------------------------------------------------------|---------------------|-----------------------------|------------------------------------------------------------------------------------------------------------------------------------------------------------------------------------------------------------------------------------------------------------|---------------------------------------------------------------------------------------------------------------------------------------------------------------------------------------------------------------------------------------------------------------------------------------------------------------------------------------------------------------------------------------------------------------------------------------|
|                | Analysis level    | Herbivory level         | Moran's <i>I</i>         | Predictor                                                    | Random factors      | Selected error distribution |                                                                                                                                                                                                                                                            |                                                                                                                                                                                                                                                                                                                                                                                                                                       |
| Chewing        | Stem              | Incidence               | Non-sig<br>(p= 0.6326)   | ~ Forest disturbance class<br>(4-level categorical variable) | Site                | Binomial<br>(glmer)         | Non-sig                                                                                                                                                                                                                                                    | We modeled the number of chewing-inflicted units in the total number of leaf blades sampled in that stem (chewing incidence) and the proportion of chewing inflicted area in damaged leaves (chewing severity) in that stem as a function of plot forest class. The final model contained site, plant family and species as random factors. Due to overdispersion we also added stem id as an observation level random factor (ORLE). |
|                |                   |                         |                          |                                                              | Species             |                             |                                                                                                                                                                                                                                                            |                                                                                                                                                                                                                                                                                                                                                                                                                                       |
|                |                   | Family                  |                          |                                                              |                     |                             |                                                                                                                                                                                                                                                            |                                                                                                                                                                                                                                                                                                                                                                                                                                       |
|                | Stem id (OLRE)    | Tweedie<br>(glmmTMB)    | Significant<br>(p≤ 0.01) |                                                              |                     |                             |                                                                                                                                                                                                                                                            |                                                                                                                                                                                                                                                                                                                                                                                                                                       |
|                | Site              |                         |                          |                                                              |                     |                             |                                                                                                                                                                                                                                                            |                                                                                                                                                                                                                                                                                                                                                                                                                                       |
|                | Species           |                         |                          |                                                              |                     |                             |                                                                                                                                                                                                                                                            |                                                                                                                                                                                                                                                                                                                                                                                                                                       |
| Plot           | Severity          | Non-sig<br>(p= 0.7515)  | Family                   | Gaussian                                                     | Non-sig             |                             |                                                                                                                                                                                                                                                            |                                                                                                                                                                                                                                                                                                                                                                                                                                       |
|                |                   |                         | Stem id (OLRE)           |                                                              |                     |                             |                                                                                                                                                                                                                                                            |                                                                                                                                                                                                                                                                                                                                                                                                                                       |
| Mining         | Stem              | Incidence               | Non-sig<br>(p= 0.9139)   | Site                                                         | Binomial<br>(glmer) | Non-sig                     | As for chewing levels, we modeled mining incidence and severity as a function of plot forest class, with site, plant family and species as random factors. To deal with overdispersion we also added stem id as an observation level random factor (ORLE). |                                                                                                                                                                                                                                                                                                                                                                                                                                       |
|                |                   |                         |                          | Species                                                      |                     |                             |                                                                                                                                                                                                                                                            |                                                                                                                                                                                                                                                                                                                                                                                                                                       |
|                |                   | Family                  |                          |                                                              |                     |                             |                                                                                                                                                                                                                                                            |                                                                                                                                                                                                                                                                                                                                                                                                                                       |
|                | Stem id (OLRE)    | Tweedie<br>(glmmTMB)    | Non-sig                  |                                                              |                     |                             |                                                                                                                                                                                                                                                            |                                                                                                                                                                                                                                                                                                                                                                                                                                       |
|                | Site              |                         |                          |                                                              |                     |                             |                                                                                                                                                                                                                                                            |                                                                                                                                                                                                                                                                                                                                                                                                                                       |
|                | Species           |                         |                          |                                                              |                     |                             |                                                                                                                                                                                                                                                            |                                                                                                                                                                                                                                                                                                                                                                                                                                       |
| Plot           | Severity          | Non-sig<br>(p= 0.4301)  | Family                   | Gaussian                                                     | Non-sig             |                             |                                                                                                                                                                                                                                                            |                                                                                                                                                                                                                                                                                                                                                                                                                                       |
|                |                   |                         | Stem id (OLRE)           |                                                              |                     |                             |                                                                                                                                                                                                                                                            |                                                                                                                                                                                                                                                                                                                                                                                                                                       |
| Galling        | Stem              | Incidence               | Non-sig<br>(p= 0.6558)   | -                                                            | Gaussian            | Non-sig                     | Regular linear model containing plot-level weighted mining severity as a function of forest class.                                                                                                                                                         |                                                                                                                                                                                                                                                                                                                                                                                                                                       |
|                |                   |                         |                          | Severity                                                     |                     |                             |                                                                                                                                                                                                                                                            |                                                                                                                                                                                                                                                                                                                                                                                                                                       |
|                |                   | Plot                    | Non-sig<br>(p= 0.8803)   | -                                                            |                     |                             |                                                                                                                                                                                                                                                            |                                                                                                                                                                                                                                                                                                                                                                                                                                       |
|                | Stem              | Incidence               | Non-sig<br>(p= 0.9769)   | Site                                                         | Binomial<br>(glmer) | Non-sig                     |                                                                                                                                                                                                                                                            | As for chewing and mining, we modeled galling incidence and severity as a function of plot forest class, with site, plant family, species and stem id as random factors.                                                                                                                                                                                                                                                              |
|                |                   |                         |                          | Species                                                      |                     |                             |                                                                                                                                                                                                                                                            |                                                                                                                                                                                                                                                                                                                                                                                                                                       |
|                |                   | Family                  |                          |                                                              |                     |                             |                                                                                                                                                                                                                                                            |                                                                                                                                                                                                                                                                                                                                                                                                                                       |
| Plot           | Severity          | Non-sig<br>(p= 0.5133)  | Stem id (OLRE)           | Tweedie<br>(glmmTMB)                                         | Non-sig             |                             |                                                                                                                                                                                                                                                            |                                                                                                                                                                                                                                                                                                                                                                                                                                       |
|                |                   |                         | Site                     |                                                              |                     |                             |                                                                                                                                                                                                                                                            |                                                                                                                                                                                                                                                                                                                                                                                                                                       |
| Plot           | Incidence         | Non-sig<br>(p= 0.07187) | -                        | Gaussian                                                     | Non-sig             |                             |                                                                                                                                                                                                                                                            |                                                                                                                                                                                                                                                                                                                                                                                                                                       |
|                |                   |                         | Severity                 |                                                              |                     | Non-sig<br>(p= 0.1116)      | -                                                                                                                                                                                                                                                          |                                                                                                                                                                                                                                                                                                                                                                                                                                       |
