# Supplementary material for: Assessing invertebrate herbivory in human‐modified tropical forest canopies
Source: PubMed Central journal article supplement (PMC8093672; doi:10.1002/ece3.7295), 2021-03-26
Supplement: ECE3-11-4012-s003.pdf [file ECE3-11-4012-s003.pdf]

| Plot code | Forest class      | Latitude | Longitude | Altitude<br>(m.a.s.l.) | Slope (%) | Clay<br>(g/kg) | Distance to<br>edge (m) |
|-----------|-------------------|----------|-----------|------------------------|-----------|----------------|-------------------------|
| 261_10    | Undisturbed       | -3,01872 | -55,00517 | 144                    | 1,41      | 814,67         | 297,56                  |
| 261_9     | Undisturbed       | -3,04035 | -55,01518 | 139                    | 3,27      | 824,00         | 1517,11                 |
| 363_3     | Undisturbed       | -3,29672 | -54,96369 | 132                    | 4,56      | 396,00         | 2629,36                 |
| 363_6     | Undisturbed       | -3,33631 | -54,95630 | 178                    | 4,94      | 776,00         | 2344,08                 |
| 363_7     | Undisturbed       | -3,32041 | -54,96073 | 163                    | 5,63      | 721,33         | 2851,41                 |
| 112_12    | Logged            | -2,69311 | -54,45194 | 139                    | 1,76      | 818,67         | 316,16                  |
| 112_8     | Logged            | -2,69362 | -54,49582 | 143                    | 10,33     | 818,67         | 88,06                   |
| 260_1     | Logged            | -3,00266 | -54,89505 | 126                    | 5,70      | 777,33         | 302,10                  |
| 260_4     | Logged            | -3,02022 | -54,85698 | 105                    | 4,46      | 746,67         | 304,33                  |
| 69_8      | Logged            | -2,51497 | -54,67529 | 135                    | 4,34      | 662,67         | 80,75                   |
| 129_10    | Logged-and-burned | -2,72633 | -54,77706 | 113                    | 3,18      | 794,67         | 75,27                   |
| 129_5     | Logged-and-burned | -2,71472 | -54,74897 | 97                     | 6,34      | 582,67         | 180,90                  |
| 260_5     | Logged-and-burned | -2,98406 | -54,87891 | 107                    | 4,39      | 720,00         | 194,32                  |
| 357_2     | Logged-and-burned | -3,30576 | -54,91240 | 158                    | 5,83      | 754,67         | 237,34                  |
| 69_11     | Logged-and-burned | -2,57402 | -54,67121 | 101                    | 1,66      | 478,67         | 81,53                   |
| 129_11    | Secondary         | -2,70589 | -54,78637 | 120                    | 3,73      | 754,67         | 75,89                   |
| 357_3     | Secondary         | -3,30048 | -54,89061 | 135                    | 6,55      | 820,00         | 119,10                  |
| 357_4     | Secondary         | -3,28304 | -54,85465 | 71                     | 2,98      | 88,00          | 42,70                   |
| 357_6     | Secondary         | -3,25727 | -54,88871 | 113                    | 8,33      | 134,67         | 82,59                   |
| 357_9     | Secondary         | -3,26371 | -54,89322 | 115                    | 14,94     | 465,33         | 270,56                  |
