# Supplementary material for: Assessing invertebrate herbivory in human‐modified tropical forest canopies
Source: PubMed Central journal article supplement (PMC8093672; doi:10.1002/ece3.7295), 2021-03-26
Supplement: ECE3-11-4012-s004.pdf [file ECE3-11-4012-s004.pdf]

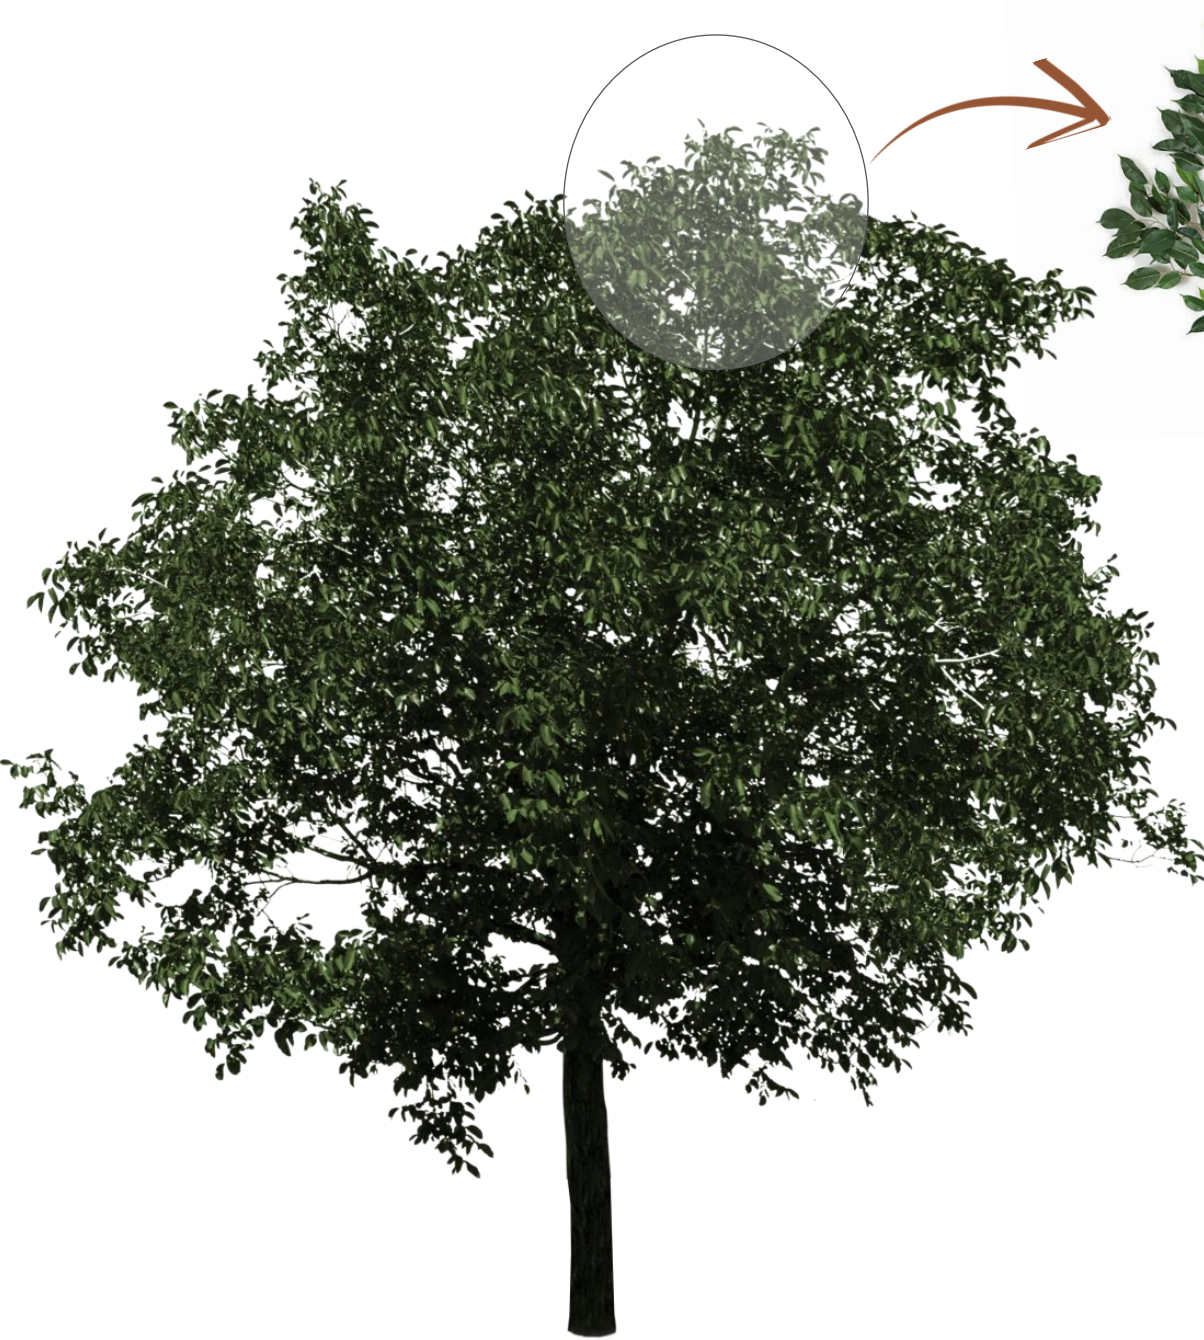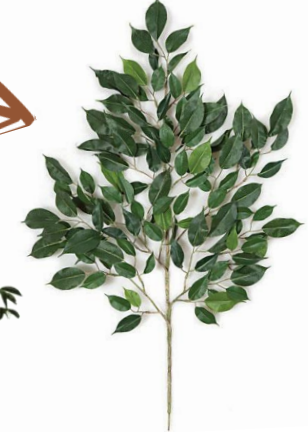

e.g. a branch with  $n = 10$  leaves

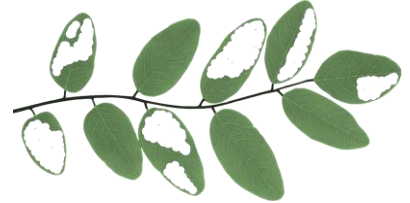

### Incidence

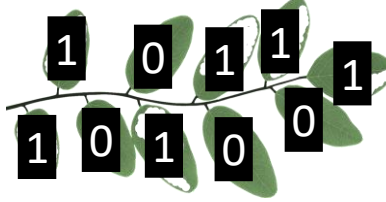

(60% = 6 herbivored leaves / 10)

### Severity

$$\sum_{i=1}^n H$$

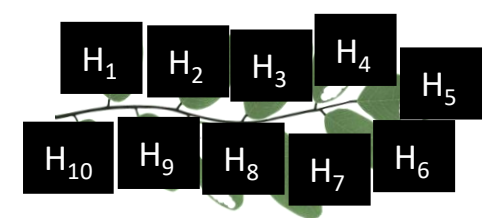

(~35% =  $H_1 + H_2 + \dots + H_{10} / 10$ )
