# Supplementary material for: Assessing invertebrate herbivory in human‐modified tropical forest canopies
Source: PubMed Central journal article supplement (PMC8093672; doi:10.1002/ece3.7295), 2021-03-26

 Stem-level

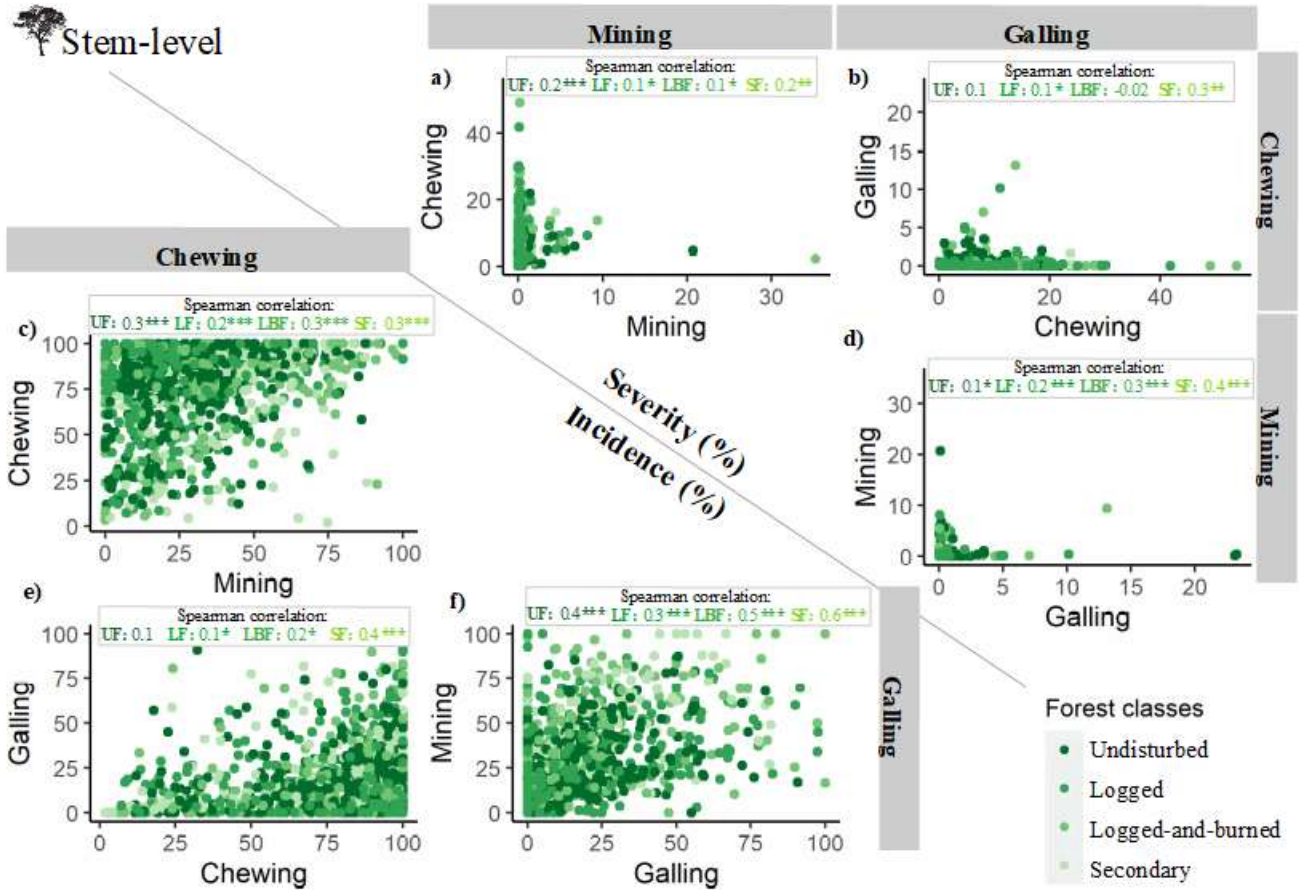

 Plot-level

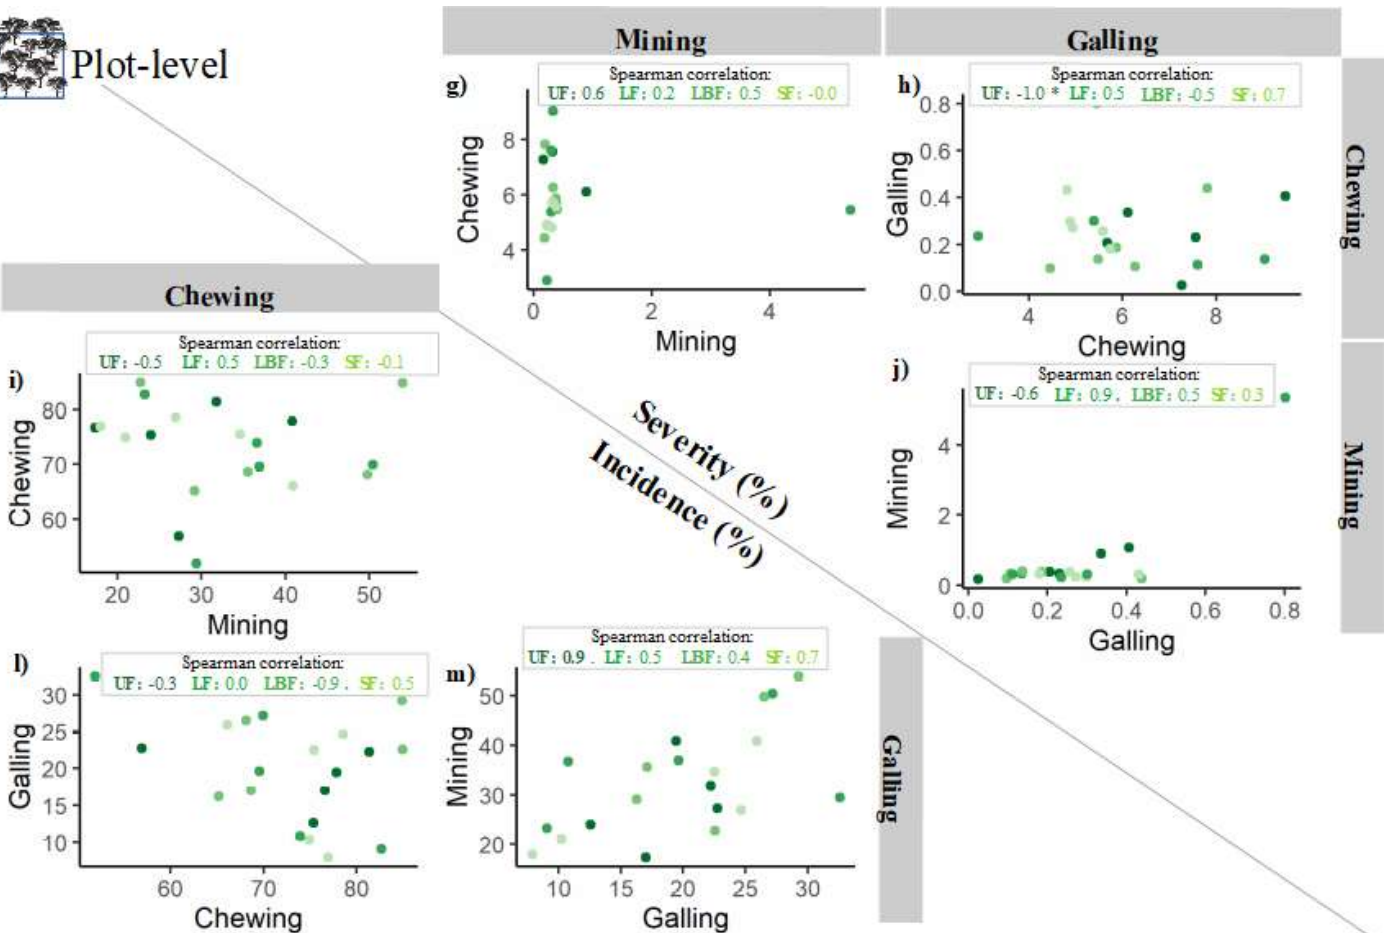

Supplement: ECE3-11-4012-s006.pdf [file ECE3-11-4012-s006.pdf]
