# Supplementary material for: Assessing invertebrate herbivory in human‐modified tropical forest canopies
Source: PubMed Central journal article supplement (PMC8093672; doi:10.1002/ece3.7295), 2021-03-26

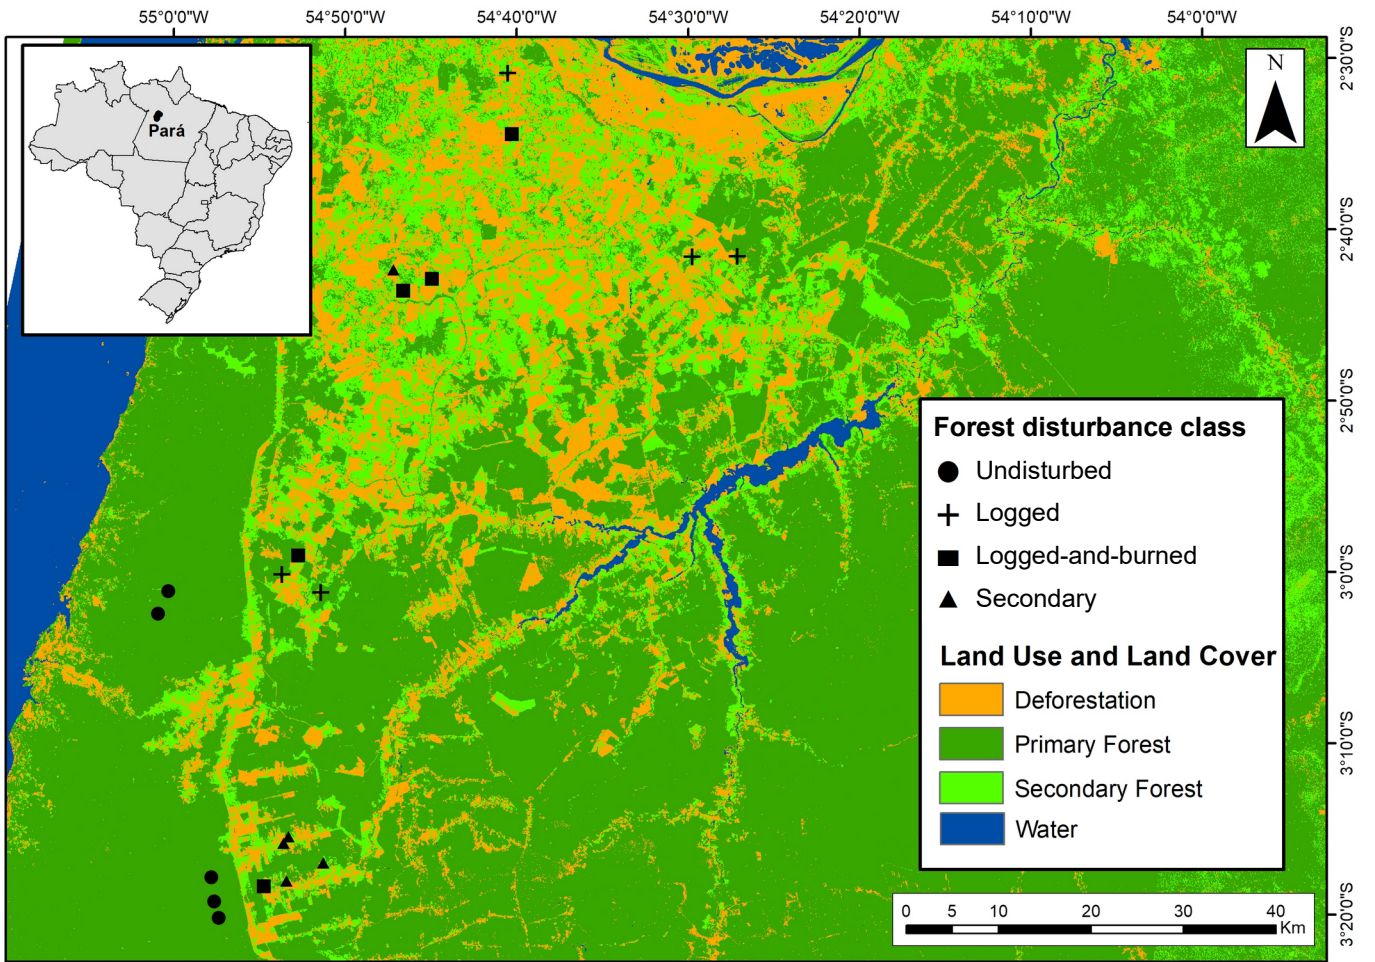

Supplement: ECE3-11-4012-s007.pdf [file ECE3-11-4012-s007.pdf]
